# Supplementary material for: Genome-wide association study reveals novel QTLs and candidate genes for panicle number in rice
Source: Front Genet. 2024 Nov 5;15:1470294. doi: 10.3389/fgene.2024.1470294 (PMC11573766; doi:10.3389/fgene.2024.1470294)
Supplement: Supplementary file 1 [file DataSheet1.xlsx]

## Sheet: Supplementary Table 1
Supplementary Table 1. List of the 411 varieties used in this study.
ID	Germplasm name	Panicle number
		2021	2022	2021/2022
W1	Huangsanbai	14.2	16	15.1
W2	Xiganlizhihong1	12.8	13	12.9
W3	Aijiaohongdao	12.6	13.6667	13.1333
W4	Aijiaoheitouhong	11.8	12.6667	12.2333
W5	Hongguzhong2	14.2	13.3333	13.7667
W6	Niangaodao	13.4	15.3333	14.3667
W7	Jiangbei	14.6	17.3333	15.9667
W8	Jijiaodao	12.6	11.6667	12.1333
W9	Luganqing12	14	17	15.5
W10	Chikewandao11	14.6	13.6667	14.1333
W11	Ruanguhong	16.2	17.6667	16.9333
W12	Luhanjing	16.6	19.6667	18.1333
W13	Luoshuangqing2	15.8	19.3333	17.5667
W14	Wanqingjing	16.2	18.6667	17.4333
W15	Ciguzhong	12.4	13	12.7
W16	Duiduiwan	9.6	9.33333	9.46667
W17	Bawusan	11.8	11.3333	11.5667
W18	Sansuiqian	8.4	8.66667	8.53333
W19	Wumangxueliwu	9.6	8	8.8
W20	Baimilaolaiqing	11.4	14	12.7
W21	Banaihongdao	13	16.3333	14.6667
W22	Yingtoujing	12.2	14.3333	13.2667
W23	Heikeluoshuangqing11	15.4	16.3333	15.8667
W24	Heikeluoshuangqing12	9.2	9.66667	9.43333
W25	Honggujing	15.2	15.6667	15.4333
W26	Hongliqing	9.6	8.33333	8.96667
W27	Hongmangjing	14.6	15.6667	15.1333
W28	Huakejing	10	12	11
W29	Suliandao	10.6	11	10.8
W30	Taihuqing5	14.4	15.6667	15.0333
W31	Jinguhuang3	14.4	18.6667	16.5333
W32	Maishiqing	16	19	17.5
W33	Luzihong	13.2	18	15.6
W34	Chiwandao	12.6	15.3333	13.9667
W35	Baoruitaihuqing	12	14.6667	13.3333
W36	Xiganhuangdao4	12.6	17	14.8
W37	Ximaodazhong	11	12.6667	11.8333
W38	Xijiaolizhihong	17.8	22.6667	20.2333
W39	Xigubaidao	8.4	9.66667	9.03333
W40	Jinguhuang	14	15.6667	14.8333
W41	Jinjijiaohong1	17.6	20.6667	19.1333
W42	Songjianglaolaiqing	14.6	12.3333	13.4667
W43	Songjiangzhong	12.6	13.6667	13.1333
W44	Bianyili	14	14.3333	14.1667
W45	Xiangnuo	8.8	10	9.4
W46	Huamiaozhong	13.4	13.6667	13.5333
W47	Hongluodao	12.4	11.6667	12.0333
W48	Tiegandadao	11	12.3333	11.6667
W49	Honghonggu	18.2	22	20.1
W50	Songjiangdazhong	15.2	19.3333	17.2667
W51	Hongkezhong	7.2	6	6.6
W52	Gaojingqing	12.6	13.6667	13.1333
W53	Huangtouhongdao	11	12.3333	11.6667
W54	Huangzhong	14.2	16.6667	15.4333
W55	Hongkechunxi	12.4	12.3333	12.3667
W56	Toulaizhong	12.6	11.6667	12.1333
W57	Cuganluwan45	9	9.33333	9.16667
W58	Cuganhuangzhong	10.6	12	11.3
W59	Cugansongguhong	12.6	14.6667	13.6333
W60	Wanhonggu43	10.4	11.6667	11.0333
W61	Cuganlizhihong	14.2	18	16.1
W62	Wanzhong	18.4	22.6667	20.5333
W63	Wanchenjiazhong	13.2	15.6667	14.4333
W64	Wandao	14.8	16	15.4
W65	Wansudao	14	14.3333	14.1667
W66	Hekeluhuabai	11.8	13.6667	12.7333
W67	Heikeluoshuangqing	11.4	10.3333	10.8667
W68	Yingwugu	10.6	11.6667	11.1333
W69	Yinghonggu	9.6	10.3333	9.96667
W70	Dengqi	11	13	12
W71	Aizidao	11.8	12	11.9
W72	Aiganlaolaiqing	12.6	16	14.3
W73	Aiganhong1	13.6	15.3333	14.4667
W74	Aiyangdao	10.6	9.66667	10.1333
W75	Aihuangdao	12.8	12.3333	12.5667
W76	Aizibai	15.8	16	15.9
W77	Aijiaoluhuabai	13	9.66667	11.3333
W78	Aijiaogailiangzhong	11.2	14	12.6
W79	Hongguzhong	13.4	14.6667	14.0333
W80	Aijiaobai	12.6	11.3333	11.9667
W81	Aijiaohuangdao2	11.8	14.3333	13.0667
W82	Aijiaojinlaotou3	12.2	13	12.6
W83	Qinzhong	12	14	13
W84	Xinguohuang	11.2	11.6667	11.4333
W85	Didazhong	12.6	14.6667	13.6333
W86	Luganbai	15.2	16	15.6
W87	Baishuqing	9.8	11	10.4
W88	Cuganluwan	8.6	10	9.3
W89	Shuihonggu	9.8	10.3333	10.0667
W90	Yezihuang	9.4	10.6667	10.0333
W91	Baikewan1	11.6	14.6667	13.1333
W92	Baikewan2	13.8	15	14.4
W93	Huangkewan	11.6	11.3333	11.4667
W94	Chikewan1	10.8	11	10.9
W95	Chikewan2	12.6	13.6667	13.1333
W96	Huanggandao	9	10	9.5
W97	Huangpiwan	11	10.6667	10.8333
W98	Tieganqing1	13.4	16.6667	15.0333
W99	Tieganqing4	12.2	13.6667	12.9333
W100	Tieganqing3	12.8	11.6667	12.2333
W101	Tieganqing5	10.2	10	10.1
W102	Tieganqing6	13.2	15.6667	14.4333
W103	Dazhongtieganqing	13	14.3333	13.6667
W104	Aigandadaotou	9.2	10	9.6
W105	Aihongdao	9.6	12	10.8
W106	Aiganhong	10.6	10.3333	10.4667
W107	Aijiaohuangdao3	11.6	12.6667	12.1333
W108	Aijiaohuangdao4	9.4	10.6667	10.0333
W109	Banaihong1	9	9.66667	9.33333
W110	Banaihong2	10.8	11.3333	11.0667
W111	Banaihong3	12	12	12
W112	Banaihongke	11.8	11.3333	11.5667
W113	Banchanghong	9.8	10.3333	10.0667
W114	Banjijiaohong	13.4	16	14.7
W115	Changhongdao1	10.8	11	10.9
W116	Changhongdao2	9.4	9.66667	9.53333
W117	Changhonggu	11.2	11	11.1
W118	Changjiaowu4	8.2	10.6667	9.43333
W119	Changjiaowu5	14.6	15	14.8
W120	Changwudao	9.4	10	9.7
W121	Zhangziwu2	9.2	9.66667	9.43333
W122	Zhangziwu3	11.4	12.3333	11.8667
W123	Cuganhuangdao	9.6	10.3333	9.96667
W124	Xiganlizhihong5	13.6	13	13.3
W125	Xiganlizhihong6	15.4	15	15.2
W126	Xiganlizhihong7	8	8	8
W127	Xiganlizhihong8	12.4	14	13.2
W128	Jiangbeilizhihong	8.6	9.33333	8.96667
W129	Hongkelaolaiqing3	11.8	14.3333	13.0667
W130	Hongkelaolaiqing4	10.8	10.3333	10.5667
W131	Haoshuaihonggu	8.8	9	8.9
W132	Jijiaohong1	11.4	12.3333	11.8667
W133	Jijiaohong2	12	12.6667	12.3333
W134	Jijiaowu7	11.8	13.6667	12.7333
W135	Jijiaowu8	12	15	13.5
W136	Jinjijiao	12	14.3333	13.1667
W137	Jinjijiaohong	12.6	15	13.8
W138	Jinlaotou	10	9.33333	9.66667
W139	Aijiaojinlaotou1	9.4	11.3333	10.3667
W140	Aijiaojinlaotou2	10.2	12	11.1
W141	Baikejinlaotou1	9.6	9.66667	9.63333
W142	Baikejinlaotou2	10	11.6667	10.8333
W143	Baikejinlaotou3	11	13.3333	12.1667
W144	Baikejinlaotou4	9.6	10.6667	10.1333
W145	Kuhonggu	10.2	13.3333	11.7667
W146	Kuoyeluojian	9	11	10
W147	Laitouwu1	11.6	14	12.8
W148	Laitouwu2	13.4	15	14.2
W149	Luchaihuang	12.4	13.3333	12.8667
W150	Luganhuang1	9.4	9.66667	9.53333
W151	Luganhuang2	9.6	10.3333	9.96667
W152	Luganhuang3	12.8	14.6667	13.7333
W153	Nenguhong1	11.2	14	12.6
W154	Nenguhong2	13.2	15.3333	14.2667
W155	Nenguhong3	9.8	11.6667	10.7333
W156	Qitouhong1	12.2	11	11.6
W157	Qitouhong2	12	12.6667	12.3333
W158	Ruanwudao	13.2	16.6667	14.9333
W159	Shuangjiangwan1	13.2	15.3333	14.2667
W160	Shuangjiangwan2	10.2	11.6667	10.9333
W161	Songguhong1	11.8	12	11.9
W162	Songguhong2	12.4	15.3333	13.8667
W163	Taihuqing	10.6	12	11.3
W164	Tianjiqing	13	16.6667	14.8333
W165	Zaotianjiqing	12.8	14	13.4
W166	Tieganwudao	13.4	14.6667	14.0333
W167	Tiesiwu1	12	13.6667	12.8333
W168	Tiesiwu2	9.8	11.3333	10.5667
W169	Tuoguoshan	11.4	13	12.2
W170	Wanguhong	9.2	11	10.1
W171	Wanhonggu1	10.2	12	11.1
W172	Wanhonggu2	15.4	14.6667	15.0333
W173	Wanhonggu3	13	13.6667	13.3333
W174	Wanhonggu4	17.2	18.3333	17.7667
W175	Wuhonggu1	11.6	12.3333	11.9667
W176	Wuhonggu2	13.4	12.3333	12.8667
W177	Xiganhuangdao11	9.4	10	9.7
W178	Xiganhuangdao2	13.8	13.3333	13.5667
W179	Xiganwu	14.8	18	16.4
W180	Xiguhuang1	9.8	12	10.9
W181	Xiguhuang2	14.8	14	14.4
W182	Xiangjingdao	9.6	12.3333	10.9667
W183	Xiaohonggu2	11	13	12
W184	Xiaohonggu3	13	13.6667	13.3333
W185	Hongkexueliqing2	8.8	11	9.9
W186	Hongkexueliqing3	13.2	12.6667	12.9333
W187	Hongkexueli	11	11.3333	11.1667
W188	Yanhongdao1	12	14	13
W189	Yanhongdao	8	9.33333	8.66667
W190	Zaohongdao	9.8	10.3333	10.0667
W191	Zaohonggu	12.6	11.6667	12.1333
W192	Zaosanhuang1	16	15.6667	15.8333
W193	Zaosanhuang2	11.6	12.6667	12.1333
W194	Zaosanhuang3	9.6	7.66667	8.63333
W195	Zaowudao4	8.8	9	8.9
W196	Zaowudao5	9.6	11	10.3
W197	Zaowudao6	10.8	11.6667	11.2333
W198	Zaowu	10.6	11.6667	11.1333
W199	Aisandan	11.6	11.3333	11.4667
W200	Tieganlizhihong	10.2	9.66667	9.93333
W201	Tieganhong	10.4	10.6667	10.5333
W202	Tieganhongdao	11	11.6667	11.3333
W203	Changjiaotianjiwu	8.8	9.66667	9.23333
W204	Zhenzezhong	12.4	11.6667	12.0333
W205	Zhongheitouhong	12	12.6667	12.3333
W206	Chiheitouhong	10.4	9.33333	9.86667
W207	Tiejingqing	13.4	16.3333	14.8667
W208	Huangheitouhong	11	12.3333	11.6667
W209	Changzhong1	9.6	10	9.8
W210	Changzhong2	12.4	15	13.7
W211	Haixinhe	12.8	14.6667	13.7333
W212	Heizhong1	11.6	11.6667	11.6333
W213	Heizhong2	13.2	15.3333	14.2667
W214	Hongmaodazhong	11	11.6667	11.3333
W215	Hongmangdazhong	11.8	13.6667	12.7333
W216	Jigengdao	10.6	11	10.8
W217	Jijiaohuang1	11.6	12.6667	12.1333
W218	Jijiaohuang2	12.4	12.6667	12.5333
W219	Jijiaohuang3	8.2	9	8.6
W220	Laohudao	12.2	13.3333	12.7667
W221	Laohuluojian4	11.4	11.6667	11.5333
W222	Laohuluojian5	13.4	14	13.7
W223	Tianjiqing6	10.2	13.6667	11.9333
W224	Tiewangdadao	8.2	9.66667	8.93333
W225	Yaoaizi1	12.8	14	13.4
W226	Yaoaizi2	9.6	9	9.3
W227	Aidazhong	9.4	8.66667	9.03333
W228	Aihuangzhong	11.2	9.66667	10.4333
W229	Baikeqijingqing	10.6	12.6667	11.6333
W230	Chihonggu1	11.2	11.3333	11.2667
W231	Chihonggu2	11.6	13	12.3
W232	Chuiwudao3	11.4	10	10.7
W233	Chuiwudao4	9.2	10	9.6
W234	Cuguanhuangdao	9	11.3333	10.1667
W235	Guancaiqing	10.6	10	10.3
W236	Zaoheitouhong	8.2	6.66667	7.43333
W237	Zaoheitouhong1	9	10	9.5
W238	Xiganhuangdao1	12.4	14	13.2
W239	Yiqizhong	9.4	12.3333	10.8667
W240	Cuganlizhihong1	8.8	9.33333	9.06667
W241	Huagu	16.6	20.3333	18.4667
W242	Bainuo	11.4	10.3333	10.8667
W243	Huangxiangbiannuogu	12.8	13	12.9
W244	Jiuyuewan	14	18	16
W245	Chikewandao	9.6	11	10.3
W246	Zaowanjing	5.2	6	5.6
W247	Yezhumao	10.2	11	10.6
W248	Aichaizhongjiazhong	10.4	9.66667	10.0333
W249	Xiaozhongmandao	13.6	12.6667	13.1333
W250	Erhuangdao	13	13.6667	13.3333
W251	Xiatangdazhong	11.2	10	10.6
W252	Luchaihong	10.8	12.3333	11.5667
W253	Chiguhong	13.8	16.6667	15.2333
W254	Aidatou	10.6	9.66667	10.1333
W255	Wangjiadao	10.6	12.6667	11.6333
W256	Tietouhong	12.8	13	12.9
W257	Cuganhuangdao1	9.2	11	10.1
W258	Hongkeluoshuangqing	11	12.6667	11.8333
W259	Lutouhong	10.6	13.3333	11.9667
W260	Sishitou	13	14.3333	13.6667
W261	Huizao	9.2	11.6667	10.4333
W262	Liulizhong	10.8	12.6667	11.7333
W263	Wuxizhong	15.8	17	16.4
W264	Jijiaochi	13.8	15.6667	14.7333
W265	Xiejiazhong	9	10	9.5
W266	Baidiegu	11.8	14	12.9
W267	Lutouhong1	12	11.6667	11.8333
W268	Duijingu	13	11.6667	12.3333
W269	Toulaizhong2	13.4	11.6667	12.5333
W270	Xiaohuangzao	11	12	11.5
W271	Yanhongdao2	11.8	14.6667	13.2333
W272	Hongkenuo	12.4	14	13.2
W273	Huakenuo	11.2	14	12.6
W274	Zaoshirihuangdao	9.6	11.6667	10.6333
W275	Xiangluhuang	14.8	15	14.9
W276	Hunanhuang	13	14.3333	13.6667
W277	Wanzhongqiu	10.6	13.3333	11.9667
W278	Muduzhong	10.8	9.66667	10.2333
W279	Dahedao	14.2	14.6667	14.4333
W280	Daichangqing	10.8	11	10.9
W281	Aizijing	10.2	13.6667	11.9333
W282	Tieganqing2	11.2	12.6667	11.9333
W283	Baiguzhong	11.3333	12.3333	11.8333
W284	Luhuabai	14	15.3333	14.6667
W285	Changgengqing	13.2	15.3333	14.2667
W286	Xiaofenghuang	11.6	14.3333	12.9667
W287	Wanhuangdao	12.6	11.3333	11.9667
W288	Xiaoqingzhong	10.4	11	10.7
W289	Huizao2	8.4	8.33333	8.36667
W290	Luhuang	14.6	15.6667	15.1333
W291	Dadaotou	10.2	11	10.6
W292	Baikehuangsanshi	13	12.3333	12.6667
W293	Majinnuo	14.2	13.6667	13.9333
W294	Hongmangxiangjingnuo	11.2	12.6667	11.9333
W295	Huajiaonuo	12.4	14.6667	13.5333
W296	Yangnuodao	13.8	14.6667	14.2333
W297	Xueliqingnuodao	14.6	16.3333	15.4667
W298	Hongmangnuo	18.6	19.6667	19.1333
W299	Dadaotou2	11	11.6667	11.3333
W300	Xichainuo	13.6	14	13.8
W301	Yangxiannuo	17.6	21.3333	19.4667
W302	Pudongqing	9.4	11.3333	10.3667
W303	Qiaobinghuang	10.6	11.6667	11.1333
W304	Niumaohuang	11.2	13	12.1
W305	Cuidao	11	12.6667	11.8333
W306	Muxiqiunuo	13.2	15	14.1
W307	Majinnuo2	9.6	12.6667	11.1333
W308	Hongmuxiqiu	10.6	13	11.8
W309	Jintannuo	14	15	14.5
W310	Zhuzongnuo	16.4	19.6667	18.0333
W311	Changzhong3	11	10	10.5
W312	Sanzaoqi	14.4	17.6667	16.0333
W313	Shanghaiqing	12.2	12.6667	12.4333
W314	Muxiqiu	8.8	9.66667	9.23333
W315	Baikeaiwan	10.2	9.33333	9.76667
W316	Shiluqing	11	12	11.5
W317	Gaoliangqing	12.2	13	12.6
W318	Kuobandalüzhong	11	13	12
W319	Luganqing	9.6	11	10.3
W320	Luhuabai1	11.6	11.3333	11.4667
W321	Haidongqing	10.6	11.6667	11.1333
W322	Qijiangqing	11.6	13.6667	12.6333
W323	Kongqueqing	12	15.3333	13.6667
W324	Yingtoudao	10.8	13	11.9
W325	Chenjiadao	9.8	10.6667	10.2333
W326	Damandao	10.2	9.33333	9.76667
W327	Taihu	9.4	10.6667	10.0333
W328	Huangnuo	10	11.3333	10.6667
W329	Qingdao	7.6	8.33333	7.96667
W330	Yefenghuang	12.2	15	13.6
W331	Yilimang	10.4	12	11.2
W332	Yangzhong	9.6	9	9.3
W333	Muxiqiu23	10.4	11.3333	10.8667
W334	Yangdao	14.2	15.6667	14.9333
W335	Tianluohuang	7.8	9	8.4
W336	Jiucaiqing	10.4	12	11.2
W337	Duirizhong	12.8	15.3333	14.0667
W338	Xueliqing	13.8	13	13.4
W339	Luoshuangqing	10	11.6667	10.8333
W340	Mansanzao	10.2	12.6667	11.4333
W341	Buxuenuo	19.2	24.3333	21.7667
W342	Wannuodao	13.4	15.3333	14.3667
W343	Xichainuo2	12	12	12
W344	Yangfeilaifeng	11.4	12.3333	11.8667
W345	Yedao	9.4	10.3333	9.86667
W346	Baowushi	10.8	12.3333	11.5667
W347	Zhongshuyangdao	12.2	13	12.6
W348	Yangdaofeilaifeng	10.6	11	10.8
W349	Yedao2	10.6	11.3333	10.9667
W350	Youmangyangdao	10.4	11.3333	10.8667
W351	Xiaoyangdao	9	8.66667	8.83333
W352	345Hao	10.2	11.3333	10.7667
W353	Yangdao1	10.6	11	10.8
W354	Juhuahuang	13.4	15.3333	14.3667
W355	Aijiguang	10.6	11.3333	10.9667
W356	Guozidao	10	11.3333	10.6667
W357	Wannuodao11	14	12.6667	13.3333
W358	Zaoniumaohuang	15.2	18	16.6
W359	Luohanhuang	12.6	15	13.8
W360	Muxiqiu22	9.6	12.3333	10.9667
W361	Lijingqing	17	20.3333	18.6667
W362	Zhimanuo	13.6	14.6667	14.1333
W363	Yishixing	10.4	10	10.2
W364	Huangmangdao	11.2	13.3333	12.2667
W365	Youmangbaikedao	8	9	8.5
W366	Wuxihuang	9.2	11	10.1
W367	Dasuitoujingdao	12.8	13.6667	13.2333
W368	Youmangluhuabai	10	10	10
W369	Zaobaikedao	10	10.6667	10.3333
W370	Yilimang2	9	11.6667	10.3333
W371	Gailianghuangjing	10.2	12.3333	11.2667
W372	Wuqitou	9.6	8.33333	8.96667
W373	Zhaiqiao1Hao	11.6	11	11.3
W374	Huangkewanguangtou	11.6	11.3333	11.4667
W375	Hongmangjing2	9.6	11	10.3
W376	Baikudao	10.4	10.3333	10.3667
W377	Wanluohanhuang	9.4	9.66667	9.53333
W378	Changkaifenghuangdao	10.8	12.6667	11.7333
W379	Chuchuhuang	9.2	10.3333	9.76667
W380	Wuguinuo	14.4	19	16.7
W381	Kuihuanuo	12.4	12	12.2
W382	Huaihuanuo	11.8	14.3333	13.0667
W383	Huagunuodao	11	11.3333	11.1667
W384	Hongmangxiangjingnuo1	9	8.66667	8.83333
W385	Hongmangnuo2	13	14	13.5
W386	Lannuodao	11.6	12	11.8
W387	Luganbai1	14.8	14.6667	14.7333
W388	Dabaijing	12	13.6667	12.8333
W389	Yangbaijing	8.6	8.33333	8.46667
W390	Lijingqing1	12.2	15	13.6
W391	Tuosangang	12	12.3333	12.1667
W392	Wuxidao	10.8	13	11.9
W393	Xiangjingnuo	14.2	15.6667	14.9333
W394	Huangkenuo	13.6	15.3333	14.4667
W395	Zaobaiyuannuo	11.2	12.3333	11.7667
W396	Baikenuo	11.6	13.3333	12.4667
W397	Hongkenuo4	15	13.3333	14.1667
W398	Dongnuodao	13.8	13.3333	13.5667
W399	Kuajinuo	11.6	12	11.8
W400	Majinnuo3	11	12.3333	11.6667
W401	Hongkenuo2	12.2	14.3333	13.2667
W402	Dongnuodao1	13.2	13.3333	13.2667
W403	Baikemajinnuo	13	14	13.5
W404	Huangkenuo1	14.6	16.3333	15.4667
W405	Yejinuo	13.2	13.6667	13.4333
W406	Chike	14.4	12.6667	13.5333
W407	Chuanjingdao	13.2	15	14.1
W408	Niutaihuang	11.4	13.6667	12.5333
W409	Hongguzhong1	13.4	13.6667	13.5333
W410	Yedianshu	12.4	12	12.2
W411	Aijiaoyangdao	12.8	15.3333	14.0667

## Sheet: Supplementary Table 2
Supplementary Table 2. The significant SNPs of panicle number
2021				2022				2021/2022
Chromosome	Position	P-value		Chromosome	Position	P-value		Chromosome	Position	P-value
1	3681185	1.43023e-05		1	3681185	1.41525e-05		1	3681185	7.71112e-06
1	3681213	6.65202e-05		1	3854116	2.39688e-05		1	3681213	5.93879e-05
1	3681246	7.80333e-05		1	3905918	1.29812e-05		1	3681246	8.09851e-05
1	3682371	4.80341e-05		1	3971262	8.16847e-05		1	3682371	5.47281e-05
1	3688977	4.60278e-05		1	3992101	4.7655e-05		1	3689033	8.8902e-05
1	3689033	3.16856e-05		1	3992168	5.67149e-05		1	3689049	5.62626e-05
1	3689049	3.81549e-05		1	4000467	7.6718e-05		1	3689151	8.45436e-05
1	3689065	6.39227e-05		1	4022631	9.06424e-05		1	3689203	8.43734e-05
1	3689151	9.39998e-05		1	5762499	4.95637e-05		1	3825848	5.21499e-05
1	3689203	7.28941e-05		1	13078373	3.80202e-05		1	3854116	1.71566e-05
1	3691453	9.67203e-05		1	24264169	4.11472e-05		1	3873466	5.65549e-05
1	3702117	8.4193e-05		1	30326040	5.65719e-05		1	3873468	8.10272e-05
1	3719159	5.58744e-05		1	41521594	7.42789e-05		1	3880131	7.1107e-05
1	3719255	9.75647e-05		3	2643838	8.71073e-05		1	3880162	6.7358e-05
1	3746395	8.51263e-05		3	23665949	8.71073e-05		1	3882217	6.88074e-05
1	3768894	6.06275e-05		4	6288430	3.91487e-05		1	3905918	8.80431e-06
1	3777239	7.93145e-05		4	7233052	1.36405e-05		1	3944821	9.83818e-05
1	3797389	8.74496e-05		4	7234130	2.23214e-05		1	3951550	9.57239e-05
1	3825848	5.70218e-05		4	7534105	1.32373e-05		1	3957328	8.5396e-05
1	3836819	7.16313e-05		4	7534172	1.32373e-05		1	3969660	9.39059e-05
1	3854116	3.86659e-05		4	7534243	9.0309e-05		1	3969689	4.97404e-05
1	3873466	5.33151e-05		4	7534810	1.32373e-05		1	3969992	6.47938e-05
1	3873468	7.95733e-05		4	7535879	1.32373e-05		1	3971262	2.67102e-05
1	3880131	2.66536e-05		4	7535979	1.32373e-05		1	3971417	5.77344e-05
1	3880162	2.28556e-05		4	7535998	1.32373e-05		1	3971427	5.73714e-05
1	3880352	5.40227e-05		4	7536196	1.32373e-05		1	3973162	7.72572e-05
1	3880388	7.07248e-05		4	7536711	1.32373e-05		1	3973874	5.04482e-05
1	3882217	9.40648e-05		4	7536932	1.32373e-05		1	3985818	3.02182e-05
1	3882234	4.377e-05		4	7536934	1.32373e-05		1	3985819	5.29401e-05
1	3882245	4.377e-05		4	7537012	1.32373e-05		1	3987487	6.50723e-05
1	3882246	4.377e-05		4	7537193	1.32373e-05		1	3987509	4.71693e-05
1	3905918	2.21082e-05		4	7538796	1.32373e-05		1	3987531	7.98073e-05
1	3910590	8.86056e-05		4	7538824	5.67616e-05		1	3987580	4.77267e-05
1	3913345	6.24837e-05		4	7913880	2.34982e-05		1	3987948	4.7267e-05
1	3913374	9.82564e-05		4	7913883	2.34982e-05		1	3989827	8.70868e-05
1	3913430	9.08883e-05		4	7914321	2.62044e-05		1	3992101	2.2936e-05
1	3913450	9.92165e-05		4	7914690	1.32373e-05		1	3992168	2.52535e-05
1	3913611	6.98677e-05		4	7915297	1.32373e-05		1	3993197	5.10625e-05
1	3924661	6.8309e-05		4	7917102	1.32373e-05		1	3994633	7.08505e-05
1	3937869	7.37114e-05		4	7918387	1.32373e-05		1	3995548	5.40996e-05
1	3944821	6.28047e-05		4	7922599	1.32373e-05		1	3995560	6.01982e-05
1	3951550	5.3873e-05		4	7922683	1.32373e-05		1	3995604	6.06398e-05
1	3955423	7.74652e-05		4	7922813	1.32373e-05		1	3995654	3.60099e-05
1	3957328	4.34052e-05		4	7922814	1.32373e-05		1	3996199	8.00019e-05
1	3961009	9.58559e-05		4	7922849	1.32373e-05		1	3996520	7.29888e-05
1	3969506	6.42518e-05		4	9561161	1.32373e-05		1	3996760	9.07535e-05
1	3969531	9.63864e-05		4	9561307	1.32373e-05		1	3997118	8.50335e-05
1	3969655	6.74203e-05		4	9561390	1.32373e-05		1	4000240	4.89574e-05
1	3969660	5.19512e-05		5	8800533	7.98504e-05		1	4000467	2.29763e-05
1	3969689	4.54025e-05		5	23033999	8.71073e-05		1	4004731	8.90796e-05
1	3969992	7.27887e-05		6	10389872	1.69048e-05		1	4010811	9.19579e-05
1	3970414	5.45398e-05		6	10390218	5.71896e-05		1	4013954	8.8048e-05
1	3970629	6.59324e-05		6	10390245	5.71896e-05		1	4015282	6.74408e-05
1	3971051	6.35552e-05		6	15407072	8.71073e-05		1	4016336	7.90694e-05
1	3971262	1.98955e-05		6	24588227	4.03996e-05		1	4019668	9.15498e-05
1	3971417	4.50533e-05		6	27246516	8.71073e-05		1	4019709	5.78054e-05
1	3971427	3.43428e-05		6	30259217	7.38269e-05		1	4021236	9.84736e-05
1	3972764	7.94261e-05		7	319975	4.75953e-05		1	4022350	5.51625e-05
1	3973155	6.13553e-05		7	7094673	1.37576e-05		1	4022583	6.82451e-05
1	3973162	6.64701e-05		7	7522869	6.7118e-05		1	4022631	4.84994e-05
1	3973170	7.20744e-05		7	12645516	2.69776e-05		1	4025355	8.26315e-05
1	3973254	3.16294e-05		7	15962617	6.25212e-05		1	4025360	7.18414e-05
1	3973790	8.85232e-05		8	6079354	5.89057e-05		1	4025419	8.4697e-05
1	3973848	6.03453e-05		8	8208509	6.51406e-05		1	4026932	6.78355e-05
1	3973874	3.961e-05		8	11029448	5.52237e-05		1	4043723	6.45443e-05
1	3974222	8.76212e-05		8	12972718	5.28795e-06		1	4043959	8.81843e-05
1	3974611	8.5406e-05		8	19114552	6.83978e-06		1	5762018	6.48116e-05
1	3974625	7.38947e-05		8	19616305	8.71073e-05		1	5762047	6.48116e-05
1	3979393	7.24776e-05		8	21997950	6.99537e-05		1	5762499	6.48116e-05
1	3983124	9.44243e-05		8	22168950	8.99954e-05		1	13078384	4.82424e-05
1	3985818	5.67746e-06		8	22417950	9.99537e-05		1	22288000	8.14155e-05
1	3985819	8.77615e-06		8	22605980	7.31815e-05		1	24264169	2.9804e-05
1	3987183	6.88908e-05		8	22800970	8.89954e-05		1	24713262	4.38909e-05
1	3987487	3.896e-05		8	23098042	7.99537e-05		1	30326040	1.35208e-05
1	3987509	3.26003e-05		8	23617237	3.51111e-05		1	41521594	2.79769e-05
1	3987531	6.80995e-05		9	2067180	5.91331e-05		2	8458318	8.37138e-05
1	3987538	3.68517e-05		9	6706180	2.55147e-05		2	13703407	1.85711e-05
1	3987580	5.22804e-05		9	8334985	5.81998e-05		2	17762971	1.02462e-06
1	3987948	2.37028e-05		10	12215275	1.18541e-05		2	26213349	9.62511e-05
1	3989827	4.79518e-05		10	20819042	1.46945e-05		2	31798072	7.17406e-05
1	3990969	8.23685e-05		11	8044779	8.71073e-05		4	6288430	5.83744e-05
1	3992101	3.078e-05		11	10200412	5.26967e-05		4	7056297	9.01282e-05
1	3992168	3.01496e-05		11	12705734	8.71073e-05		4	7233052	1.59347e-05
1	3993197	4.88277e-05		11	15570855	5.04521e-05		4	7234130	8.25346e-05
1	3994298	6.62543e-05		11	15878083	8.71073e-05		4	7534105	1.85711e-05
1	3995442	5.77835e-05		11	18027600	9.50685e-05		4	7534172	1.85711e-05
1	3995548	4.68458e-05		12	4460027	9.6805e-05		4	7534810	1.85711e-05
1	3995560	4.41956e-05		12	15066585	9.86161e-05		4	7535879	1.85711e-05
1	3995604	3.3411e-05						4	7535979	1.85711e-05
1	3995654	2.09634e-05						4	7535998	1.85711e-05
1	3996199	5.0525e-05						4	7536196	1.85711e-05
1	3996520	6.79495e-05						4	7536711	1.85711e-05
1	3996760	8.16005e-05						4	7536932	1.85711e-05
1	3997118	7.70848e-05						4	7536934	1.85711e-05
1	4000240	3.26157e-05						4	7537012	1.85711e-05
1	4000467	1.59997e-05						4	7537193	1.85711e-05
1	4001438	8.17286e-05						4	7538796	1.85711e-05
1	4004731	7.54743e-05						4	7913880	4.02237e-05
1	4005817	9.56553e-05						4	7913883	4.02237e-05
1	4010811	5.12013e-05						4	7914321	1.6115e-05
1	4013788	8.60372e-05						4	7914690	1.85711e-05
1	4013954	4.69657e-05						4	7915297	1.85711e-05
1	4015282	4.85774e-05						4	7917102	1.85711e-05
1	4016336	4.75395e-05						4	7918387	1.85711e-05
1	4016367	7.20769e-05						4	7922599	1.85711e-05
1	4019668	5.48833e-05						4	7922683	1.85711e-05
1	4019709	3.54182e-05						4	7922813	1.85711e-05
1	4022243	9.89925e-05						4	7922814	1.85711e-05
1	4022323	9.24378e-05						4	7922849	1.85711e-05
1	4022350	5.13859e-05						4	9561390	1.85711e-05
1	4022583	8.75322e-05						4	9838727	1.85711e-05
1	4022631	6.91374e-05						4	23725026	2.5925e-05
1	4025355	8.23355e-05						5	8800533	3.89597e-05
1	4025360	6.50805e-05						5	14698345	1.51002e-05
1	4025419	6.66231e-05						6	997439	6.33745e-06
1	4026932	8.38193e-05						6	6050727	3.29041e-05
1	4043723	7.97509e-05						6	10389872	6.41375e-06
1	4043959	9.15161e-05						6	10390218	3.64563e-05
1	23863200	8.0416e-05						6	10390245	3.64563e-05
1	24264169	7.21445e-05						6	11662695	8.61611e-05
1	24713267	4.18179e-05						6	14984113	4.93227e-05
1	30326040	8.4969e-06						6	19887698	8.68163e-05
1	30326212	3.90452e-05						6	20517317	1.93808e-05
1	41521594	2.94115e-05						6	24588227	3.98683e-05
1	42925693	8.5987e-05						6	30259217	9.92751e-05
2	17762971	1.39803e-06						7	7094673	2.13042e-05
2	31798072	4.88108e-05						7	12645516	1.65306e-05
4	7233052	7.45924e-05						7	15962617	9.94699e-05
4	7914321	3.58382e-05						8	23617237	3.74857e-05
4	23725026	1.27174e-05						8	7428724	9.72692e-05
5	8800533	5.4754e-05						8	19114568	9.12647e-05
5	14698345	5.06663e-05						8	23098042	4.29452e-05
6	10390218	7.48999e-05						8	22800970	4.24018e-05
6	10390245	7.48999e-05						8	22605980	3.39074e-05
6	11662695	1.69332e-05						8	22168950	3.27658e-05
6	12148288	7.21445e-05						8	22417950	3.27658e-05
6	13370565	6.90101e-05						8	21997950	3.27658e-05
6	14623667	2.36269e-05						9	2067180	6.39372e-05
6	14984113	6.07792e-05						9	6706180	7.96749e-05
6	18843197	7.44986e-05						9	21246102	4.77639e-05
7	12645516	3.57115e-05						10	3058465	4.00512e-05
8	5596861	7.67526e-05						10	12215275	1.27045e-05
8	7281457	6.26578e-05						10	20819042	4.44498e-06
8	8208509	8.29792e-05						11	5267523	9.43145e-05
8	12941952	1.53985e-05						11	13104097	7.88956e-05
8	12972718	4.01977e-05						11	15570855	6.23562e-05
8	19114552	2.58706e-06						11	18027600	3.16003e-05
8	21997950	6.99537e-05						11	20915884	8.19656e-05
8	22168950	8.99954e-05						11	22987046	6.33978e-05
8	22417950	9.99537e-05						12	4457997	2.9804e-05
8	22605980	7.31815e-05						12	13676849	7.58491e-05
8	22800970	8.89954e-05						12	14436827	6.16739e-05
8	22998042	7.99537e-05						12	14593388	5.85377e-05
9	5669445	9.15786e-05						12	15041297	6.42176e-05
9	21246102	4.25381e-05						12	16297810	8.81141e-05
10	3058465	3.90642e-05						12	18138244	8.37079e-05
10	12215275	5.6624e-05						12	18423084	6.87578e-05
10	14268792	3.09652e-05
10	20819042	4.4409e-06
11	20906068	9.38576e-05
11	20915884	7.05536e-05
11	21008693	8.05171e-05
11	22987046	7.00683e-05
12	4457997	7.21445e-05
12	13676849	7.39445e-05
12	13866849	7.88945e-05
12	14060789	8.88989e-05
12	14200029	8.76589e-05
12	14395679	7.89989e-05
12	14593388	5.71066e-05
12	15041297	9.07702e-05

## Sheet: Supplementary Table 3
Supplementary Table 3. Functional annotation and expression of candidate genes
Cadidate Gene	Functional annotation	RNA-Seq FPKM Expression Values from MSU
		Leaves-20 days	Shoots
LOC_Os01g07660	expressed protein	0	0
LOC_Os01g07740	DEAD-box ATP-dependent RNA helicase 14, putative, expressed	5.86881	9.37817
LOC_Os01g07750	expressed protein	11.3015	24.1119
LOC_Os01g07760	phospholipase D, putative, expressed	79.4385	102.463
LOC_Os01g07770	peroxidase precursor, putative, expressed	12.9998	3.71991
LOC_Os01g07790	polygalacturonase, putative, expressed	0.0117586	0
LOC_Os01g07800	thiol-disulphide oxidoreductase DCC, putative, expressed	8.80164	2.10832
LOC_Os01g07810	protein of unknown function domain containing protein, expressed	25.3045	49.4304
LOC_Os01g07820	transposon protein, putative, CACTA, En/Spm sub-class, expressed	0	0
LOC_Os01g07830	transposon protein, putative, CACTA, En/Spm sub-class, expressed	0	0
LOC_Os01g07840	transposon protein, putative, CACTA, En/Spm sub-class, expressed	0	0
LOC_Os01g07850	glyoxalase family protein, putative, expressed	0	0
LOC_Os01g07860	retrotransposon protein, putative, unclassified, expressed	0	0
LOC_Os01g07870	ABC transporter family protein, putative, expressed	11.9264	5.94938
LOC_Os01g07900	expressed protein	0	1.38977
LOC_Os01g07930	zinc finger C-x8-C-x5-C-x3-H type family protein, expressed	0	0
LOC_Os01g07940	AGC_PVPK_like_kin82y.3 - ACG kinases include homologs to PKA, PKG and PKC, expressed	0.922402	1.41066
LOC_Os01g07950	OsGrx_S15.2 - glutaredoxin subgroup II, expressed	13.3613	18.6238
LOC_Os01g07960	acyl-protein thioesterase, putative, expressed	43.09	47.9521
LOC_Os01g07980	ankyrin, putative, expressed	0.827542	1.65838
LOC_Os01g08000	fibronectin type 3 and ankyrin repeat domains 1 protein, putative, expressed	0.532881	5.48802
LOC_Os01g08010	expressed protein	1.43776	1.18857
LOC_Os01g08060	transposon protein, putative, CACTA, En/Spm sub-class, expressed	0	0
LOC_Os01g08070	transposon protein, putative, CACTA, En/Spm sub-class, expressed	0	0
LOC_Os01g08090	flavonol-3-O-glycoside-7-O-glucosyltransferase 1, putative, expressed	1.95066	1.11356
LOC_Os01g08100	flavonol-3-O-glycoside-7-O-glucosyltransferase 1, putative, expressed	0	0
LOC_Os01g08110	flavonol-3-O-glycoside-7-O-glucosyltransferase 1, putative, expressed	1.65511	0
LOC_Os01g08120	pentatricopeptide, putative, expressed	0.225783	0
LOC_Os01g08130	phototropic-responsive NPH3 family protein, putative, expressed	10.301	4.83071
LOC_Os01g08140	phototropic-responsive NPH3 family protein, putative, expressed	5.55357	8.92133
LOC_Os01g08150	expressed protein	0	1.35091
LOC_Os01g08160	MYB family transcription factor, putative, expressed	2.4366	1.29662
LOC_Os01g08170	expressed protein	0	0
LOC_Os01g08180	BRASSINAZOLE-RESISTANT 2, putative, expressed	0	0
LOC_Os01g08190	transcriptional corepressor LEUNIG, putative, expressed	0	0.940534
LOC_Os01g08200	ubiquitin carboxyl-terminal hydrolase 14, putative, expressed	11.6163	24.1091
LOC_Os01g08220	gibberellin 3-beta-dioxygenase 2-2, putative, expressed	0	2.1634
LOC_Os01g08240	hypothetical protein	0	0
LOC_Os01g08250	retrotransposon protein, putative, unclassified, expressed	0	0

## Sheet: Supplementary Table 4
Supplementary Table 4. Sequences primer in qRT-PCR.
Primer	Sequence
LOC_Os01g07870-F	CCTTTCAGTGCAGTCGATGCT
LOC_Os01g07870-R	GCCTGTGCTATTCTCCCACCT
LOC_Os01g07950-F	AGATTTCCAGCCTACAAGCAA
LOC_Os01g07950-R	TGCCAATGCACTGAATCCACA
LOC_Os08g35860-F	CAACGCAATCATTGACGCC
LOC_Os08g35860-R	TTGCACCCCTCCCAAATGT
OsACTIN-F	CAACACCCCTGCTATGTACG
OsACTIN-R	CATCACCAGAGTCCAACACAA
